# Supplementary figures and images for: Memory-bound k -mer selection for large and evolutionarily diverse reference libraries
Source: HighWire-hosted journal article supplement (doi:10.1101/gr.279339.124), 2024-08-29

# Short-read classification in WoL-v1

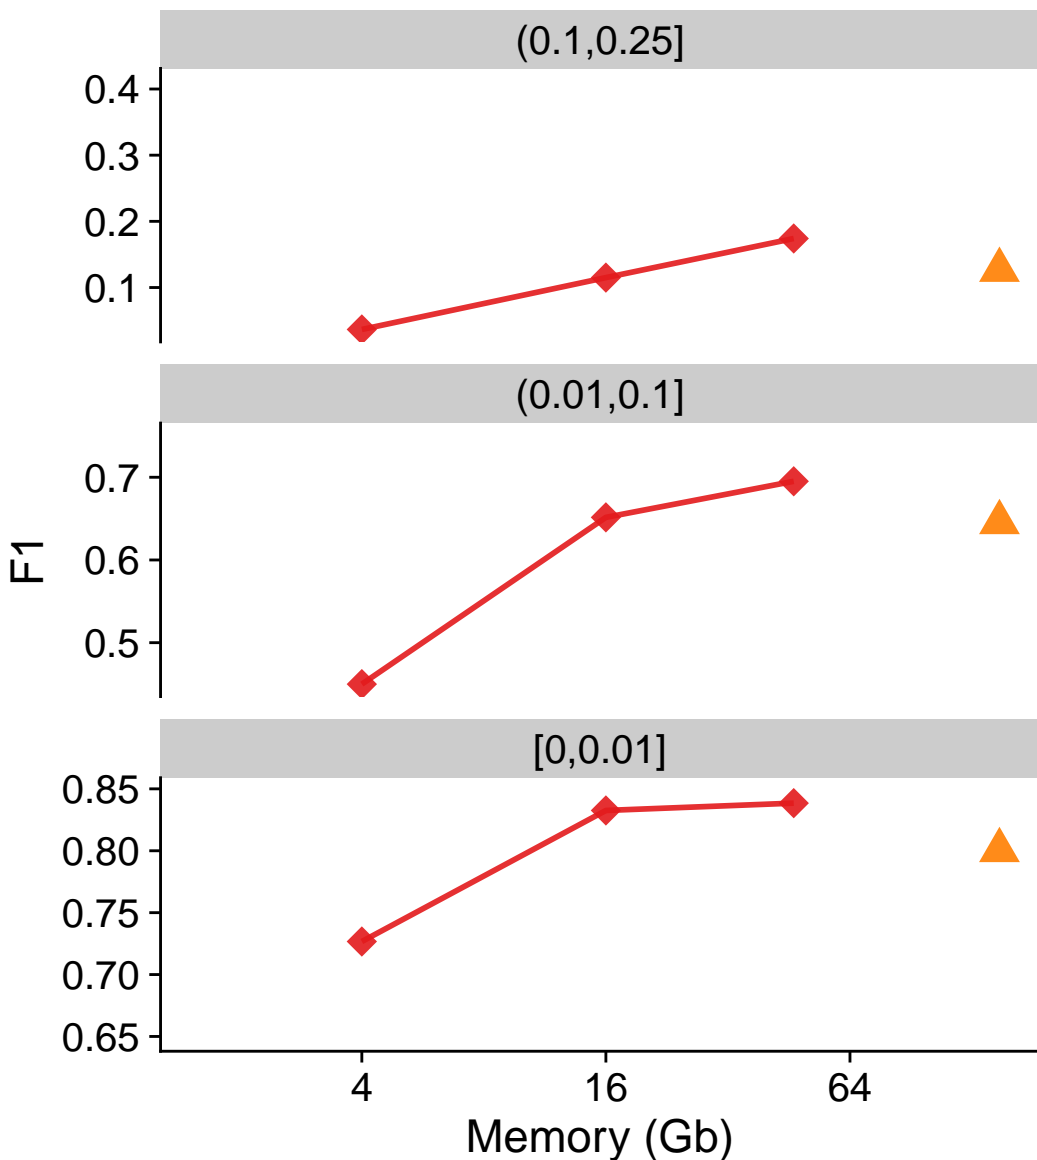

◆ Kraken-II v2.1.3    ▲ CLARK v1.2.6.1  
■ CONSULT-II v0.4.0    ● KRANK v0.3.2

Supplement: Supplemental_Code.zip [file Rplot.pdf › custom_scripts/scripts/Rplot.pdf]

# Short-read classification in WoL-v1



◆ Kraken-II v2.1.3

▲ CLARK v1.2.6.1

■ CONSULT-II v0.4.0

● KRANK v0.3.2

Supplement: Supplemental_Code.zip [file read_classification-wol-1.pdf › custom_scripts/scripts/read_classification-wol-1.pdf]

# Short-read classification in WoL-v1

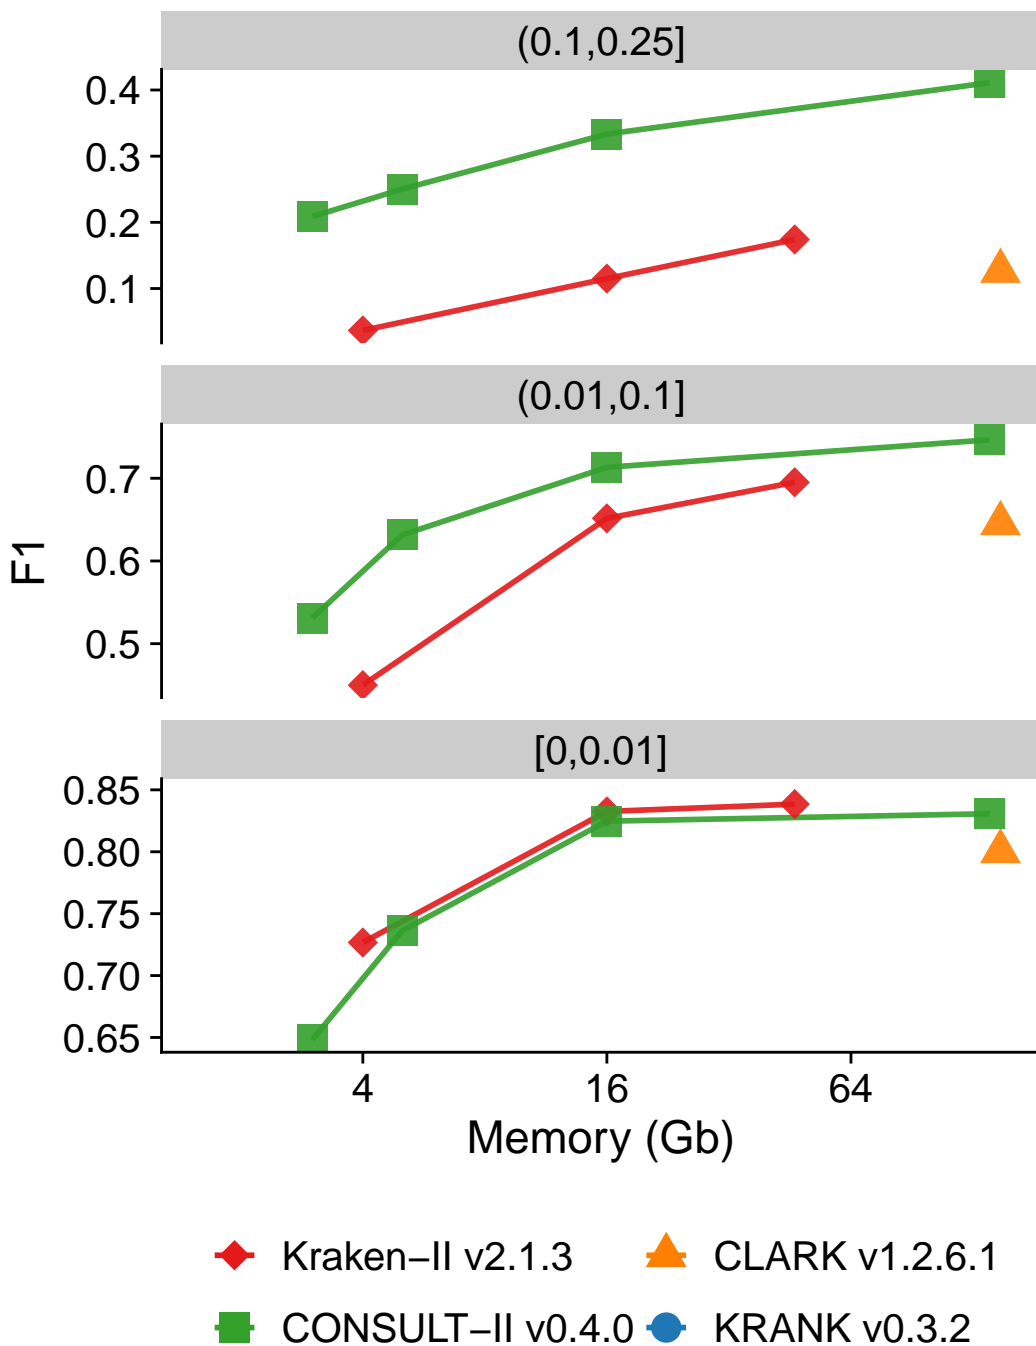

Supplement: Supplemental_Code.zip [file read_classification-wol-2.pdf › custom_scripts/scripts/read_classification-wol-2.pdf]

# Short-read classification in WoL-v1

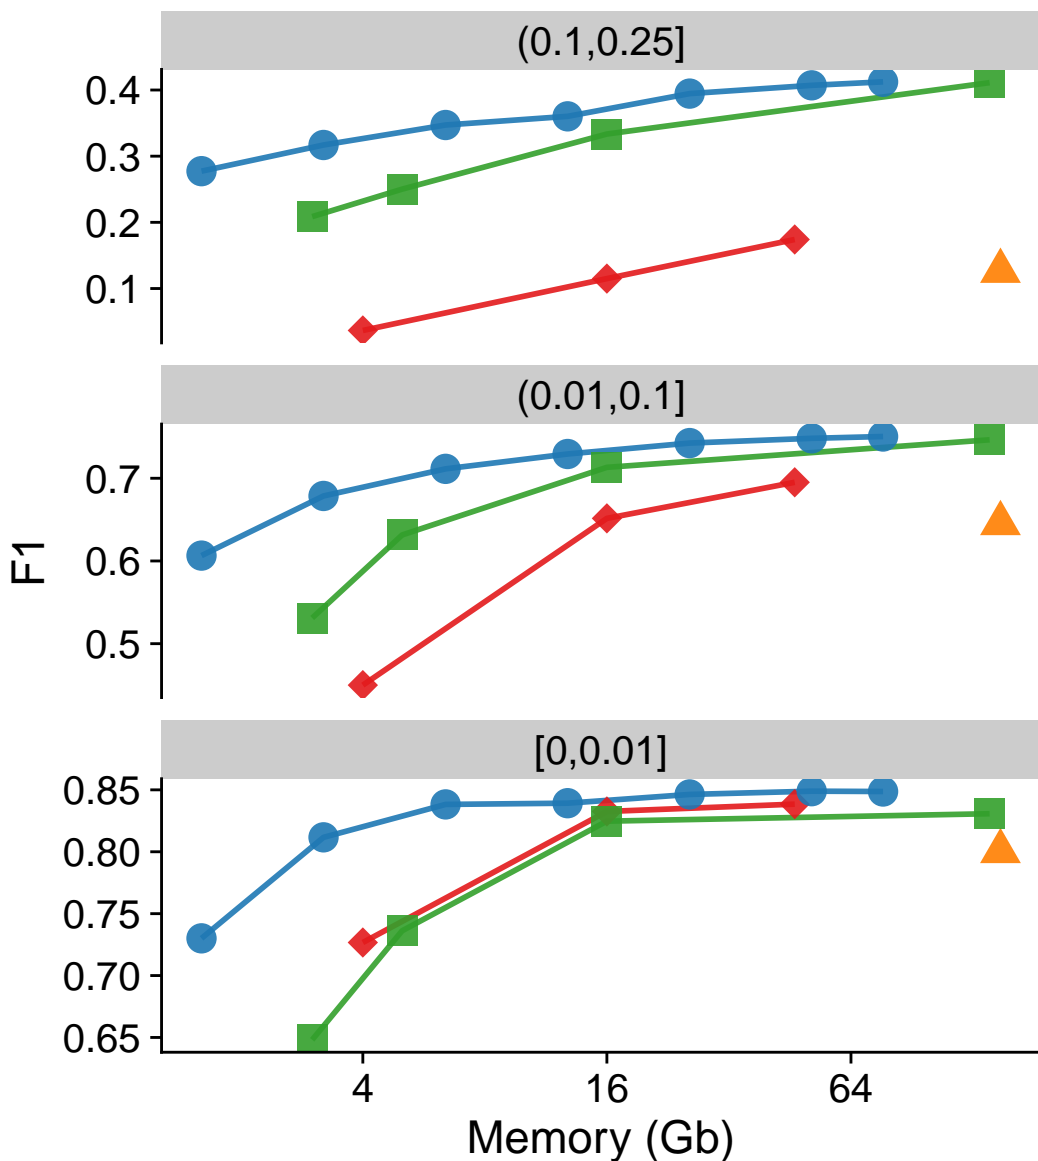

◆ Kraken-II v2.1.3    ▲ CLARK v1.2.6.1  
■ CONSULT-II v0.4.0    ● KRANK v0.3.2

Supplement: Supplemental_Code.zip [file read_classification-wol-3.pdf › custom_scripts/scripts/read_classification-wol-3.pdf]

# Short-read classification in WoL-v1

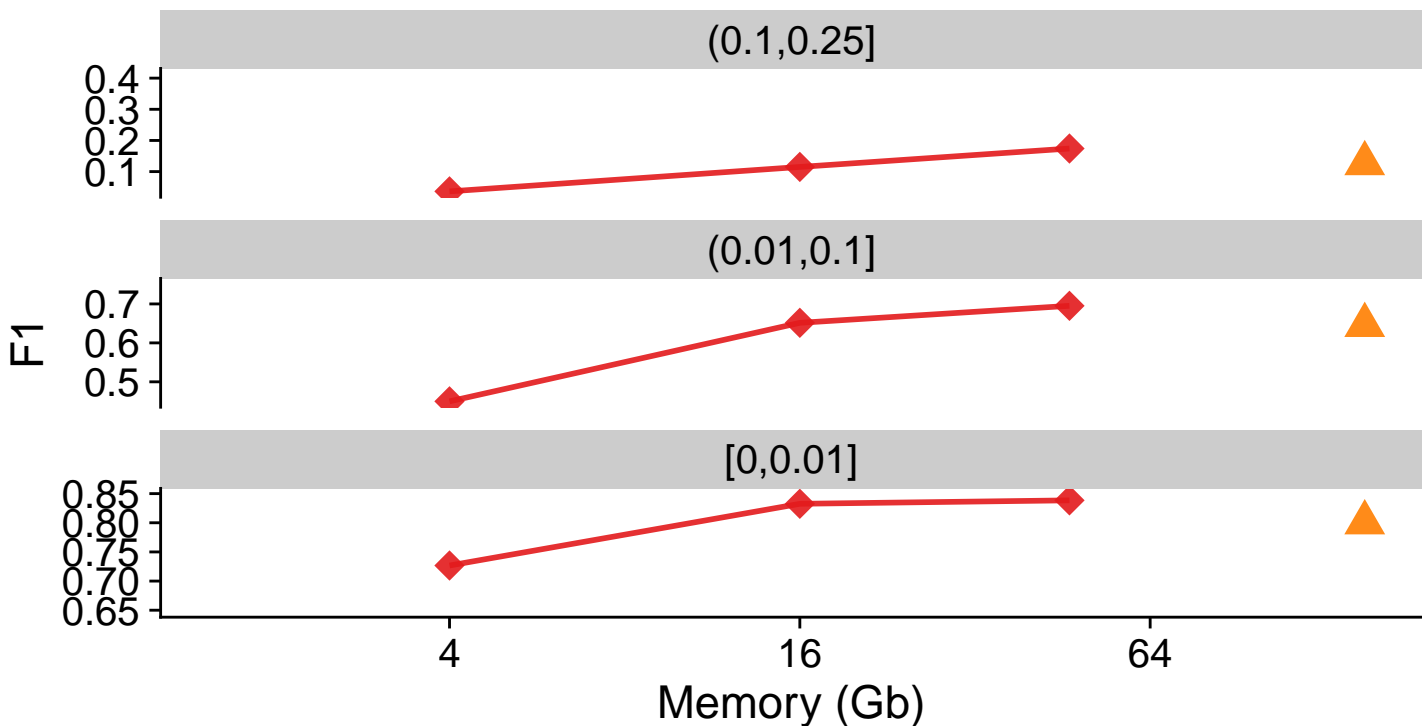

◆ Kraken-II v2.1.3    ▲ CLARK v1.2.6.1  
■ CONSULT-II v0.4.0    ● KRANK v0.3.2

Supplement: Supplemental_Code.zip [file wol-read_classification1.pdf › custom_scripts/scripts/wol-read_classification1.pdf]
